# Supplementary material for: Long-term variations in PM2.5 concentrations under changing meteorological conditions in Taiwan
Source: PubMed Central journal article supplement (PMC6488571; doi:10.1038/s41598-019-43104-x), 2019-04-29
Supplement: 41598_2019_43104_MOESM1_ESM.pdf [file 41598_2019_43104_MOESM1_ESM.pdf]

## Supporting Information

### Long-term variations in PM<sub>2.5</sub> concentrations under changing meteorological conditions in Taiwan

Fang-Yi Cheng and Chia-Hua Hsu

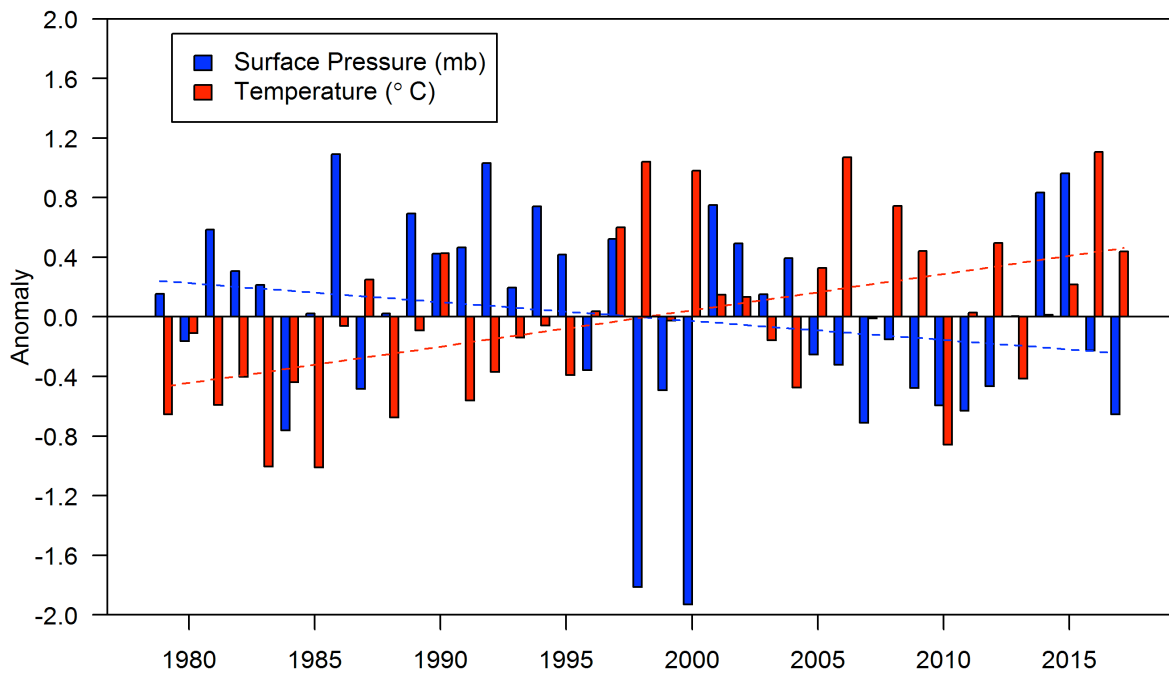

Fig. S1. Long-term variation (1979–2017) of the observed surface temperature and pressure averaged from the surface CWB weather stations in Taiwan.

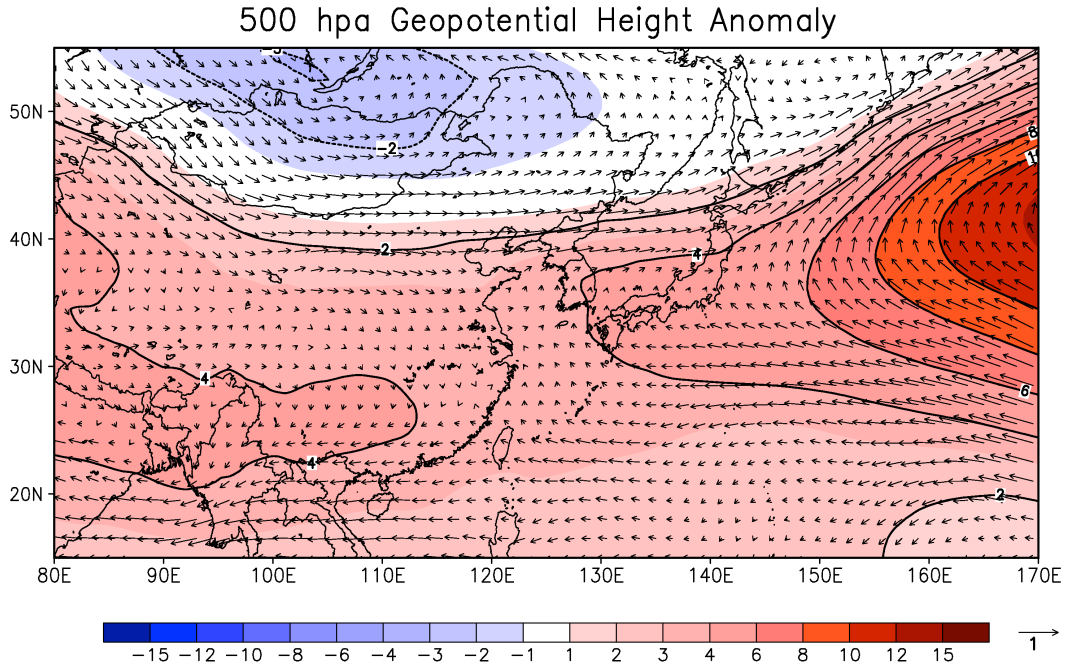

Fig. S2. Distribution of the 500-hPa geopotential height anomaly (m). Shaded colors and wind vectors represent the anomaly of the geopotential height and wind ( $\text{m s}^{-1}$ ) from 1997 to 2017 relative to the 39-year (1979 to 2017) average.
